# Supplementary material for: Thromboembolic Risks with Concurrent Direct Oral Anticoagulants and Antiseizure Medications: A Population-Based Analysis
Source: PubMed Central journal article supplement — CNS Drugs. 2022 Nov 24;36(12):1313–24. doi: 10.1007/s40263-022-00971-9 (PMC9712286; doi:10.1007/s40263-022-00971-9), 2022-11-24
Supplement: 40263_2022_971_MOESM1_ESM.pdf [file 40263_2022_971_MOESM1_ESM.pdf]

## **SUPPLEMENTARY MATERIALS**

**Title:**

Thromboembolic risks with concurrent direct oral anticoagulant and antiseizure medications: A population-based analysis

**Journal Name:**

CNS drugs

**Authors:**

Bonaventure Ip<sup>1</sup>, MD\*; Ho Ko<sup>1,2</sup>, PhD\*; LH Wong<sup>1,3</sup>, MD; CF Yip<sup>1,3</sup>, PhD; HS Lau<sup>1</sup>, MD; Alexander Lau<sup>1</sup>, MD; Xinyi Leng<sup>1</sup>, PhD; Howan Leung<sup>1</sup>, MD; Howard Chan<sup>1</sup>, PhD; Helen Chan<sup>1</sup>, BSc; Vincent Mok<sup>1</sup>, MD; Yannie Soo<sup>1</sup>, MD; Thomas Leung<sup>1</sup>, MD<sup>†</sup>

**Affiliations:**

<sup>1</sup>Department of Medicine and Therapeutics, Faculty of Medicine, The Prince of Wales Hospital, The Chinese University of Hong Kong, Hong Kong

<sup>2</sup>Li Ka Shing Institute of Health Sciences, Faculty of Medicine, The Chinese University of Hong Kong, Hong Kong

<sup>3</sup>Medical Data Analytic Centre, The Chinese University of Hong Kong, Hong Kong

**Corresponding Author:**

Thomas Leung

[drtleung@cuhk.edu.hk](mailto:drtleung@cuhk.edu.hk)

**Table S1. Annual incidence rates of ischemic stroke per drug combination (primary analysis)**

| <b>Drug combination</b> | <b>Sample size</b> | <b>Median FU (months)</b> | <b>Annual incidence rate</b> |
|-------------------------|--------------------|---------------------------|------------------------------|
| <b>PHT-API</b>          | 476                | 11                        | 8.3%                         |
| <b>PHT-DAB</b>          | 339                | 20                        | 5.8%                         |
| <b>PHT-RIV</b>          | 304                | 20                        | 5.2%                         |
| <b>VPA-API</b>          | 489                | 10                        | 4.2%                         |
| <b>VPA-DAB</b>          | 340                | 20                        | 5.8%                         |
| <b>VPA-RIV</b>          | 276                | 20                        | 5.7%                         |
| <b>LEV-API</b>          | 275                | 8                         | 5.4%                         |
| <b>LEV-DAB</b>          | 179                | 21                        | 6.5%                         |
| <b>LEV-RIV</b>          | 152                | 15                        | 6.0%                         |
| <b>NEU-API</b>          | 2345               | 11                        | 3.9%                         |
| <b>NEU-DAB</b>          | 1440               | 19                        | 3.3%                         |
| <b>NEU-RIV</b>          | 1445               | 19                        | 3.9%                         |

**ABBREVIATIONS:** Antiseizure medications: LEV: levetiracetam; NEU: P-glycoprotein and cytochrome P450 neutral antiseizure medications; PHT: phenytoin; VPA: valproate Direct oral anticoagulants: API: apixaban; DAB: dabigatran; RIV: rivaroxaban

**N.B.:** Annual incidences were estimated by the Fine-Gray method, drug combinations with sample size less than 50 were not included

**Table S2. Imputed patient characteristics after balancing with the inverse probability of treatment weighting method (epilepsy subgroup)**

|                               | CYP/P-gp neutral ASMs                                         | CYP/P-gp modulating ASMs                                                                                                                  | AMSD  | Phenytoin   | AMSD  | Valproate    | AMSD  | Levetiracetam | AMSD  |
|-------------------------------|---------------------------------------------------------------|-------------------------------------------------------------------------------------------------------------------------------------------|-------|-------------|-------|--------------|-------|---------------|-------|
| n                             | 300                                                           | 1873                                                                                                                                      |       | 756         |       | 609          |       | 417           |       |
| Daily dosage(mg)<br>mean(sd)  | GBP: 604.6(376.9)<br>PGB: 171.5(177.1)<br>Clobazam: 20.1(4.2) | Phenytoin: 144.4(91.7)<br>Valproate: 613.5(265.3)<br>Levetiracetam: 1079.2(605.2)<br>Carbamazepine: 476(131.6)<br>Phenobarbital: 94(45.7) |       | 144.4(91.7) |       | 613.5(265.3) |       | 1079.2(605.2) |       |
| <b>Demographics</b>           |                                                               |                                                                                                                                           |       |             |       |              |       |               |       |
| Age mean(sd)                  | 71.9(13.2)                                                    | 73.2(13.4)                                                                                                                                | 0.015 | 75(12.3)    | 0.080 | 73.5(13.4)   | 0.047 | 71.1(13.9)    | 0.046 |
| Female n(%)                   | 146(48.7)                                                     | 1003(53.6)                                                                                                                                | 0.044 | 396(52.4)   | 0.043 | 321(52.7)    | 0.042 | 246(59.0)     | 0.062 |
| Smoker n(%)                   | 1(0.3)                                                        | 23(1.2)                                                                                                                                   | 0.009 | 11(1.5)     | 0.010 | 5(0.8)       | 0.004 | 6(1.4)        | 0.011 |
| Drinker n(%)                  | 0(0.0)                                                        | 41(2.2)                                                                                                                                   | 0.020 | 15(2.0)     | 0.016 | 11(1.8)      | 0.015 | 12(2.9)       | 0.026 |
| <b>Medical Co-morbidities</b> |                                                               |                                                                                                                                           |       |             |       |              |       |               |       |
| CHF n(%)                      | 76(25.3)                                                      | 492(26.3)                                                                                                                                 | 0.002 | 218(28.8)   | 0.014 | 168(27.6)    | 0.009 | 95(22.8)      | 0.023 |
| IHD n(%)                      | 65(21.7)                                                      | 438(23.4)                                                                                                                                 | 0.005 | 181(23.9)   | 0.007 | 138(22.7)    | 0.000 | 105(25.2)     | 0.023 |
| PVD n(%)                      | 17(5.7)                                                       | 1298(69.3)                                                                                                                                | 0.001 | 47(6.2)     | 0.000 | 34(5.6)      | 0.000 | 22(5.3)       | 0.000 |
| IS n(%)                       | 202(67.3)                                                     | 17(0.9)                                                                                                                                   | 0.003 | 562(74.3)   | 0.027 | 441(72.4)    | 0.036 | 265(63.5)     | 0.032 |
| ATE n(%)                      | 5(1.7)                                                        | 356(19.0)                                                                                                                                 | 0.011 | 4(0.5)      | 0.008 | 7(1.1)       | 0.005 | 6(1.4)        | 0.000 |
| VTE n(%)                      | 61(20.3)                                                      | 588(31.4)                                                                                                                                 | 0.012 | 153(20.2)   | 0.016 | 85(14.0)     | 0.046 | 88(21.1)      | 0.012 |
| DM n(%)                       | 93(31.0)                                                      | 1167(62.3)                                                                                                                                | 0.003 | 240(31.7)   | 0.001 | 194(31.9)    | 0.006 | 139(33.3)     | 0.013 |
| Hypertension n(%)             | 181(60.3)                                                     | 108(5.8)                                                                                                                                  | 0.002 | 482(63.8)   | 0.002 | 392(64.4)    | 0.022 | 249(59.7)     | 0.006 |
| Hyperlipidemia n(%)           | 92(30.7)                                                      | 618(33.0)                                                                                                                                 | 0.008 | 258(34.1)   | 0.001 | 201(33.0)    | 0.001 | 142(34.1)     | 0.001 |
| AF n(%)                       | 199(66.3)                                                     | 1359(72.6)                                                                                                                                | 0.011 | 556(73.5)   | 0.025 | 465(76.4)    | 0.066 | 290(69.5)     | 0.021 |
| Major bleeding n(%)           | 13(4.3)                                                       | 1873(100.0)                                                                                                                               | 0.001 | 29(3.8)     | 0.001 | 27(4.4)      | 0.001 | 22(5.3)       | 0.007 |
| CLD n(%)                      | 1(0.3)                                                        | 82(4.4)                                                                                                                                   | 0.003 | 7(0.9)      | 0.004 | 1(0.2)       | 0.002 | 3(0.7)        | 0.003 |
| CKD n(%)                      | 11(3.7)                                                       | 13(0.7)                                                                                                                                   | 0.002 | 36(4.8)     | 0.004 | 27(4.4)      | 0.006 | 16(3.8)       | 0.000 |
| CHADS2Vasc<br>mean(sd)        | 4.5(2.1)                                                      | 81(4.3)                                                                                                                                   | 0.002 | 4.9(2.0)    | NA    | 4.7(2.0)     | NA    | 4.3(2.2)      | NA    |
| HASBLED<br>mean(sd)           | 3.4(1.3)                                                      | 4.6(2.1)                                                                                                                                  | 0.005 | 3.6(1.3)    | NA    | 3.6(1.2)     | NA    | 3.3(1.4)      | NA    |
| <b>Background Medications</b> |                                                               |                                                                                                                                           |       |             |       |              |       |               |       |
| Apixaban n(%)                 | 143(47.7)                                                     | 731(39.0)                                                                                                                                 | 0.019 | 369(48.8)   | 0.002 | 297(48.8)    | 0.002 | 210(50.4)     | 0.017 |

|                                              |             |             |       |             |       |             |       |             |       |
|----------------------------------------------|-------------|-------------|-------|-------------|-------|-------------|-------|-------------|-------|
| Dabigatran n(%)                              | 100(33.3)   | 570(30.4)   | 0.027 | 232(30.7)   | 0.025 | 192(31.5)   | 0.022 | 130(31.2)   | 0.015 |
| Edoxaban n(%)                                | 10(3.3)     | 76(4.1)     | 0.017 | 28(3.7)     | 0.008 | 28(4.6)     | 0.016 | 19(4.6)     | 0.011 |
| Rivaroxaban n(%)                             | 87(29.0)    | 478(25.5)   | 0.018 | 229(30.3)   | 0.014 | 176(28.9)   | 0.007 | 114(27.3)   | 0.008 |
| Aspirin n(%)                                 | 96(32.0)    | 618(33.0)   | 0.007 | 248(32.8)   | 0.001 | 211(34.6)   | 0.027 | 140(33.6)   | 0.015 |
| Cilostazol n(%)                              | 1(0.3)      | 2(0.1)      | 0.009 | 0(0.0)      | 0.002 | 2(0.3)      | 0.000 | 0(0.0)      | 0.002 |
| Clopidogrel n(%)                             | 23(7.7)     | 105(5.6)    | 0.001 | 39(5.2)     | 0.015 | 35(5.7)     | 0.022 | 28(6.7)     | 0.008 |
| Ticagrelor n(%)                              | 1(0.3)      | 4(0.2)      | 0.000 | 2(0.3)      | 0.000 | 0(0.0)      | 0.000 | 2(0.5)      | 0.001 |
| Simvastatin n(%)                             | 130(43.3)   | 799(42.7)   | 0.041 | 333(44.0)   | 0.008 | 287(47.1)   | 0.024 | 158(37.9)   | 0.040 |
| Rosuvastatin n(%)                            | 10(3.3)     | 0(0.0)      | 0.010 | 21(2.8)     | 0.006 | 13(2.1)     | 0.011 | 17(4.1)     | 0.003 |
| Amiodarone n(%)                              | 9(3.0)      | 52(2.8)     | 0.002 | 23(3.0)     | 0.003 | 18(3.0)     | 0.003 | 13(3.1)     | 0.001 |
| Dronedarone n(%)                             | 0(0.0)      | 54(2.9)     | 0.003 | 2(0.3)      | 0.003 | 3(0.5)      | 0.005 | 0(0.0)      | NA    |
| Rifampicin n(%)                              | 0(0.0)      | 5(0.3)      | 0.002 | 2(0.3)      | 0.002 | 0(0.0)      | NA    | 2(0.5)      | 0.004 |
| NSAID/COX2i n(%)                             | 10(3.3)     | 4(0.2)      | 0.003 | 14(1.9)     | 0.007 | 17(2.8)     | 0.002 | 14(3.4)     | 0.002 |
| <b>Laboratory Parameters</b>                 |             |             |       |             |       |             |       |             |       |
| APTT(s) median(iqr)                          | 34.3(8.5)   | 32.0(8.3)   | NA    | 33.5(7.4)   | NA    | 33.4(7.7)   | NA    | 33.7(7.3)   | NA    |
| PT(s) median(iqr)                            | 24.2(5.5)   | 22.6(5.8)   | NA    | 23.9(5.2)   | NA    | 23.8(5.0)   | NA    | 24.2(5.0)   | NA    |
| Hemoglobin(g/dL) mean(sd)                    | 12.3(1.9)   | 12.3(1.8)   | 0.061 | 12.3(1.8)   | 0.024 | 12.4(1.8)   | 0.024 | 12.3(1.9)   | 0.000 |
| Platelet(10 <sup>9</sup> /L) mean(sd)        | 235.3(84.5) | 224.6(79.5) | 0.011 | 227.5(77.7) | 0.028 | 218.1(75.3) | 0.106 | 227.3(84.2) | 0.076 |
| Creatinine(umol/L) mean(sd)                  | 89.9(46.2)  | 91.0(50.1)  | 0.042 | 93.5(62.0)  | 0.048 | 90.5(36.4)  | 0.009 | 91.2(46.5)  | 0.020 |
| ALT(IU/L) mean(sd)                           | 31.5(22.2)  | 34.4(35.0)  | 0.114 | 34(37.4)    | 0.039 | 29.8(28.1)  | 0.010 | 41.3(39.5)  | 0.132 |
| HbA1c(%) mean(sd)                            | 6.2(1.1)    | 6.1(1.0)    | 0.017 | 6.2(1.0)    | 0.013 | 6.1(1.1)    | 0.035 | 6.1(0.9)    | 0.020 |
| HDL-C(mmol/L) mean(sd)                       | 1.3(0.4)    | 1.3(0.4)    | 0.021 | 1.3(0.4)    | 0.022 | 1.3(0.4)    | 0.056 | 1.3(0.4)    | 0.030 |
| LDL-C(mmol/L) mean(sd)                       | 2.2(0.8)    | 2.1(0.8)    | 0.005 | 2.2(0.8)    | 0.005 | 2.1(0.8)    | 0.014 | 2.1(0.8)    | 0.032 |
| TC(mmol/L) mean(sd)                          | 4.1(1.0)    | 4.0(0.9)    | 0.030 | 4.1(0.9)    | 0.006 | 3.9(0.9)    | 0.052 | 3.9(0.9)    | 0.047 |
| Triglyceride(mmol/L) mean(sd)                | 1.4(0.7)    | 1.3(0.7)    | 0.010 | 1.3(0.8)    | 0.014 | 1.3(0.6)    | 0.045 | 1.3(0.7)    | 0.019 |
| <b>Annual Incidence Rate of Outcomes (%)</b> |             |             |       |             |       |             |       |             |       |
| IS                                           | 8.8%        | 8.4%        | NA    | 8.1%        | NA    | 8.7%        | NA    | 7.7%        | NA    |
| VTE                                          | 5.2%        | 5.3%        | NA    | 4.6%        | NA    | 3.9%        | NA    | 6.0%        | NA    |
| Mortality                                    | 13.2%       | 18.8%       | NA    | 18.1%       | NA    | 19.8%       | NA    | 16.0%       | NA    |

**Abbreviations:** ASM: antiseizure medications; AF: atrial fibrillation; ALT: alanine aminotransferase; AMSD: absolute mean standardized difference; APTT: activated partial thromboplastin time; ATE: non-ischemic stroke arterial thromboembolism; CHF: congestive heart failure; CKD: chronic kidney disease; CLD: chronic liver disease; COX2i: cyclo-oxygenase 2 inhibitor; CYP/P-gp: cytochrome P450/P-glycoprotein; DM: diabetes mellitus; GBP: gabapentin; HbA1c: glycated hemoglobin A1c; HDL-C: high density lipoprotein cholesterol; ICH: intracranial hemorrhage; IHD: ischemic heart disease; IS: ischemic stroke; LDL-C: low density lipoprotein cholesterol; NA: not applicable; NSAID: non-steroidal anti-inflammatory drugs; PGB: pregabalin; PT: prothrombin time; PVD: peripheral vascular disease; TC: total cholesterol; VTE: venous thromboembolism

**N.B.:** CYP/P-gp modulating ASMs collectively included phenytoin (n=756), valproate (n=609), levetiracetam (n=417), carbamazepine (n=63) and phenobarbital (n=28).

**Table S3. Annual incidence rates of ischemic stroke per drug combination – epilepsy subgroup**

| <b>Drug combination</b> | <b>Sample size</b> | <b>Median FU (months)</b> | <b>Annual incidence rate</b> |
|-------------------------|--------------------|---------------------------|------------------------------|
| <b>PHT-API</b>          | 297                | 12                        | 8.4%                         |
| <b>PHT-DAB</b>          | 229                | 27                        | 7.1%                         |
| <b>PHT-RIV</b>          | 202                | 23                        | 6.3%                         |
| <b>VPA-API</b>          | 240                | 11                        | 9.7%                         |
| <b>VPA-DAB</b>          | 191                | 23                        | 7.8%                         |
| <b>VPA-RIV</b>          | 150                | 20                        | 6.8%                         |
| <b>LEV-API</b>          | 167                | 10                        | 9.0%                         |
| <b>LEV-DAB</b>          | 127                | 25                        | 5.6%                         |
| <b>LEV-RIV</b>          | 104                | 16                        | 9.8%                         |
| <b>NEU-API</b>          | 116                | 16                        | 8.2%                         |
| <b>NEU-DAB</b>          | 82                 | 24                        | 8.1%                         |
| <b>NEU-RIV</b>          | 92                 | 19                        | 9.0%                         |

**ABBREVIATIONS:** Antiseizure medications: LEV: levetiracetam; NEU: P-glycoprotein and cytochrome P450 neutral antiseizure medications; PHT: phenytoin; VPA: valproate  
Direct oral anticoagulants: API: apixaban; DAB: dabigatran; RIV: rivaroxaban

**N.B.:** Annual incidences were estimated by the Fine-Gray method, drug combinations with sample size less than 50 were not included

**Table S4. Imputed patient characteristics after balancing with the inverse probability of treatment weighting method (AF subgroup)**

|                               | CYP/P-gp neutral<br>ASMs                               | CYP/P-gp modulating<br>ASMs                                                                                                 | AMSD  | Phenytoin  | AMSD  | Valproate  | AMSD  | Levetiracetam | AMSD  |
|-------------------------------|--------------------------------------------------------|-----------------------------------------------------------------------------------------------------------------------------|-------|------------|-------|------------|-------|---------------|-------|
| n                             | 3789                                                   | 2142                                                                                                                        |       | 817        |       | 816        |       | 394           |       |
| Daily dosage(mg)<br>mean(sd)  | GBP: 509(346)<br>PGB: 100(85.3)<br>Clobazam: 20.1(4.0) | Phenytoin: 150(103)<br>Valproate: 558(242)<br>Levetiracetam: 1002(571)<br>Carbamazepine: 485(162)<br>Phenobarbital: 102(54) |       | 150(103)   |       | 558(242)   |       | 1002(571)     |       |
| <b>Demographics</b>           |                                                        |                                                                                                                             |       |            |       |            |       |               |       |
| <b>Age mean(sd)</b>           | 78(9.7)                                                | 76.5(10.5)                                                                                                                  | 0.013 | 77.5(10.2) | 0.025 | 76.4(10.9) | 0.076 | 75.1(10.5)    | 0.045 |
| <b>Female n(%)</b>            | 1681(44.4)                                             | 1139(53.2)                                                                                                                  | 0.032 | 425(52.0)  | 0.031 | 427(52.3)  | 0.077 | 236(59.9)     | 0.037 |
| <b>Smoker n(%)</b>            | 63(1.7)                                                | 31(1.4)                                                                                                                     | 0.001 | 15(1.8)    | 0.007 | 8(1.0)     | 0.007 | 7(1.8)        | 0.009 |
| <b>Drinker n(%)</b>           | 57(1.5)                                                | 40(1.9)                                                                                                                     | 0.004 | 15(1.8)    | 0.003 | 14(1.7)    | 0.001 | 9(2.3)        | 0.013 |
| <b>Medical Co-morbidities</b> |                                                        |                                                                                                                             |       |            |       |            |       |               |       |
| <b>CHF n(%)</b>               | 1603(42.3)                                             | 708(33.1)                                                                                                                   | 0.013 | 284(34.8)  | 0.059 | 268(32.8)  | 0.093 | 123(31.2)     | 0.000 |
| <b>IHD n(%)</b>               | 1174(31.0)                                             | 595(27.8)                                                                                                                   | 0.032 | 236(28.9)  | 0.017 | 213(26.1)  | 0.041 | 114(28.9)     | 0.005 |
| <b>IS n(%)</b>                | 1467(38.7)                                             | 1470(68.6)                                                                                                                  | 0.001 | 600(73.4)  | 0.084 | 559(68.5)  | 0.161 | 270(68.5)     | 0.050 |
| <b>ATE n(%)</b>               | 69(1.8)                                                | 22(1.0)                                                                                                                     | 0.004 | 4(0.5)     | 0.013 | 14(1.7)    | 0.002 | 4(1.0)        | 0.005 |
| <b>VTE n(%)</b>               | 145(3.8)                                               | 110(5.1)                                                                                                                    | 0.029 | 44(5.4)    | 0.007 | 36(4.4)    | 0.005 | 26(6.6)       | 0.009 |
| <b>DM n(%)</b>                | 1273(33.6)                                             | 762(35.6)                                                                                                                   | 0.009 | 304(37.2)  | 0.054 | 283(34.7)  | 0.009 | 146(37.1)     | 0.014 |
| <b>Hypertension n(%)</b>      | 2570(67.8)                                             | 1487(69.4)                                                                                                                  | 0.049 | 576(70.5)  | 0.025 | 560(68.6)  | 0.003 | 269(68.3)     | 0.028 |
| <b>PVD n(%)</b>               | 201(5.3)                                               | 131(6.1)                                                                                                                    | 0.005 | 49(6.0)    | 0.009 | 53(6.5)    | 0.002 | 25(6.3)       | 0.005 |
| <b>Hyperlipidemia n(%)</b>    | 1261(33.3)                                             | 795(37.1)                                                                                                                   | 0.003 | 313(38.3)  | 0.001 | 291(35.7)  | 0.011 | 156(39.6)     | 0.032 |
| <b>Epilepsy n(%)</b>          | 199(5.3)                                               | 2142(100.0)                                                                                                                 | 0.021 | 556(68.1)  | 0.087 | 465(57.0)  | 0.161 | 290(73.6)     | 0.178 |
| <b>Major bleeding n(%)</b>    | 248(6.5)                                               | 1359(63.4)                                                                                                                  | 0.013 | 34(4.2)    | 0.003 | 33(4.0)    | 0.023 | 22(5.6)       | 0.006 |
| <b>CLD n(%)</b>               | 28(0.7)                                                | 91(4.2)                                                                                                                     | 0.011 | 9(1.1)     | 0.000 | 1(0.1)     | 0.006 | 7(1.8)        | 0.004 |
| <b>CKD n(%)</b>               | 257(6.8)                                               | 19(0.9)                                                                                                                     | 0.006 | 46(5.6)    | 0.018 | 47(5.8)    | 0.008 | 20(5.1)       | 0.004 |
| <b>CHADS2Vasc mean(sd)</b>    | 4.7(1.8)                                               | 117(5.5)                                                                                                                    | 0.072 | 5.2(1.7)   | NA    | 5(1.8)     | NA    | 4.9(1.8)      | NA    |
| <b>HASBLED mean(sd)</b>       | 3(1.3)                                                 | 5.0(1.8)                                                                                                                    | 0.011 | 3.7(1.2)   | NA    | 3.5(1.2)   | NA    | 3.6(1.3)      | NA    |
| <b>Background Medications</b> |                                                        |                                                                                                                             |       |            |       |            |       |               |       |
| <b>Apixaban n(%)</b>          | 1620(42.8)                                             | 918(42.9)                                                                                                                   | 0.006 | 349(42.7)  | 0.034 | 360(44.1)  | 0.045 | 170(43.1)     | 0.038 |
| <b>Dabigatran n(%)</b>        | 1181(31.2)                                             | 666(31.1)                                                                                                                   | 0.012 | 226(27.7)  | 0.039 | 231(28.3)  | 0.016 | 113(28.7)     | 0.025 |

|                                             |            |             |       |             |       |            |       |             |       |
|---------------------------------------------|------------|-------------|-------|-------------|-------|------------|-------|-------------|-------|
| <b>Edoxaban n(%)</b>                        | 132(3.5)   | 57(2.7)     | 0.007 | 16(2.0)     | 0.023 | 24(2.9)    | 0.009 | 15(3.8)     | 0.010 |
| <b>Rivaroxaban n(%)</b>                     | 856(22.6)  | 483(22.5)   | 0.021 | 226(27.7)   | 0.023 | 201(24.6)  | 0.007 | 96(24.4)    | 0.002 |
| <b>Aspirin n(%)</b>                         | 1145(30.2) | 780(36.4)   | 0.020 | 305(37.3)   | 0.059 | 293(35.9)  | 0.034 | 149(37.8)   | 0.068 |
| <b>Cilostazol n(%)</b>                      | 17(0.4)    | 2(0.1)      | 0.011 | 0(0.0)      | 0.004 | 2(0.2)     | 0.003 | 0(0.0)      | 0.001 |
| <b>Clopidogrel n(%)</b>                     | 278(7.3)   | 132(6.2)    | 0.003 | 55(6.7)     | 0.017 | 49(6.0)    | 0.016 | 24(6.1)     | 0.004 |
| <b>Ticagrelor n(%)</b>                      | 15(0.4)    | 4(0.2)      | 0.001 | 2(0.2)      | 0.001 | 0(0.0)     | 0.003 | 2(0.5)      | 0.002 |
| <b>Simvastatin n(%)</b>                     | 1603(42.3) | 990(46.2)   | 0.003 | 402(49.2)   | 0.072 | 391(47.9)  | 0.003 | 157(39.8)   | 0.056 |
| <b>Atorvastatin n(%)</b>                    | 0(0.0)     | 0(0.0)      | 0.007 | 0(0.0)      | NA    | 0(0.0)     | NA    | 0(0.0)      | NA    |
| <b>Rosuvastatin n(%)</b>                    | 163(4.3)   | 73(3.4)     | 0.003 | 29(3.5)     | 0.008 | 22(2.7)    | 0.014 | 18(4.6)     | 0.003 |
| <b>Amiodarone n(%)</b>                      | 126(3.3)   | 91(4.2)     | 0.003 | 37(4.5)     | 0.003 | 31(3.8)    | 0.006 | 21(5.3)     | 0.018 |
| <b>Dronedarone n(%)</b>                     | 52(1.4)    | 9(0.4)      | 0.000 | 2(0.2)      | 0.012 | 4(0.5)     | 0.005 | 1(0.3)      | 0.003 |
| <b>Rifampicin n(%)</b>                      | 2(0.1)     | 4(0.2)      | 0.015 | 2(0.2)      | 0.000 | 0(0.0)     | 0.000 | 2(0.5)      | 0.004 |
| <b>NSAID/COX2i n(%)</b>                     | 218(5.8)   | 47(2.2)     | 0.020 | 13(1.6)     | 0.027 | 23(2.8)    | 0.026 | 6(1.5)      | 0.023 |
| <b>Laboratory Parameters</b>                |            |             |       |             |       |            |       |             |       |
| <b>APTT(s) median(iqr)</b>                  | 34.7(8.0)  | 32.1(8.0)   | NA    | 33.1(7.0)   | NA    | 34(7.8)    | NA    | 33.9(7.4)   | NA    |
| <b>PT(s) median (iqr)</b>                   | 24.6(5.3)  | 22.7(5.5)   | NA    | 23.7(4.9)   | NA    | 24.2(5.1)  | NA    | 24.4(5.0)   | NA    |
| <b>Hemoglobin(g/dL) mean(sd)</b>            | 12.2(1.8)  | 12.3(1.8)   | 0.010 | 12.2(1.8)   | 0.07  | 12.5(1.8)  | 0.089 | 12.3(1.9)   | 0.061 |
| <b>Platelet(10<sup>9</sup>/L) mean(sd)</b>  | 224(70.5)  | 218.8(70.9) | 0.035 | 225.5(72.3) | 0.023 | 214(69.8)  | 0.120 | 215.3(71.0) | 0.024 |
| <b>Creatinine(umol/L) mean(sd)</b>          | 98(48.9)   | 96.0(54.1)  | 0.014 | 96(53.1)    | 0.023 | 96.2(51.1) | 0.005 | 99.2(66.3)  | 0.024 |
| <b>ALT(IU/L) mean(sd)</b>                   | 31.5(40.5) | 33.9(40.6)  | 0.009 | 34.8(46.0)  | 0.019 | 30(34.1)   | 0.042 | 41.1(44.4)  | 0.184 |
| <b>HbA1c(%) mean(sd)</b>                    | 6.4(1.1)   | 6.2(1.0)    | 0.035 | 6.2(1.0)    | 0.003 | 6.2(1.1)   | 0.048 | 6.2(1.0)    | 0.019 |
| <b>HDL-C(mmol/L) mean(sd)</b>               | 1.3(0.4)   | 1.3(0.4)    | 0.011 | 1.3(0.4)    | 0.015 | 1.2(0.4)   | 0.119 | 1.3(0.4)    | 0.046 |
| <b>LDL-C(mmol/L) mean(sd)</b>               | 2(0.7)     | 2.1(0.7)    | 0.004 | 2.1(0.7)    | 0.018 | 2.1(0.8)   | 0.021 | 2(0.7)      | 0.037 |
| <b>TC(mmol/L) mean(sd)</b>                  | 3.9(0.9)   | 3.9(0.9)    | 0.012 | 4(0.9)      | 0.014 | 3.9(0.9)   | 0.028 | 3.8(0.8)    | 0.012 |
| <b>Triglyceride(mmol/L) mean(sd)</b>        | 1.3(0.7)   | 1.3(0.7)    | 0.016 | 1.3(0.8)    | 0.034 | 1.3(0.6)   | 0.006 | 1.3(0.7)    | 0.049 |
| <b>Annual Incidence Rate of Outcome (%)</b> |            |             |       |             |       |            |       |             |       |
| <b>IS</b>                                   | 5.0%       | 7.9%        | NA    | 9.5%        | NA    | 6.3%       | NA    | 8.5%        | NA    |
| <b>VTE</b>                                  | 0.2%       | 1.0%        | NA    | 1.7%        | NA    | 0.2%       | NA    | 1.4%        | NA    |
| <b>Mortality</b>                            | 12.7%      | 22.5%       | NA    | 23.9%       | NA    | 21%        | NA    | 18.4%       | NA    |



**Abbreviations:** ASM: antiseizure medications; AF: atrial fibrillation; ALT: alanine aminotransferase; AMSD: absolute mean standardized difference; APTT: activated partial thromboplastin time; ATE: non-ischemic stroke arterial thromboembolism; CHF: congestive heart failure; CKD: chronic kidney disease; CLD: chronic liver disease; COX2i: cyclo-oxygenase 2 inhibitor; CYP/P-gp: cytochrome P450/P-glycoprotein; DM: diabetes mellitus; GBP: gabapentin; HbA1c: glycated hemoglobin A1c; HDL-C: high density lipoprotein cholesterol; ICH: intracranial hemorrhage; IHD: ischemic heart disease; IS: ischemic stroke; LDL-C: low density lipoprotein cholesterol; NA: not applicable; NSAID: non-steroidal anti-inflammatory drugs; PGB: pregabalin; PT: prothrombin time; PVD: peripheral vascular disease; TC: total cholesterol; VTE: venous thromboembolism

**N.B.:** CYP/P-gp modulating ASMs collectively included phenytoin (n=817), valproate (n=816), levetiracetam (n=394), carbamazepine (n=85) and phenobarbital (n=30).

**Table S5. Annual incidence rates of ischemic stroke per drug combination – atrial fibrillation subgroup**

| <b>Drug combination</b> | <b>Sample size</b> | <b>Median FU (months)</b> | <b>Annual incidence rate</b> |
|-------------------------|--------------------|---------------------------|------------------------------|
| <b>PHT-API</b>          | 349                | 12                        | 10%                          |
| <b>PHT-DAB</b>          | 255                | 27                        | 7.1%                         |
| <b>PHT-RIV</b>          | 197                | 23                        | 6.1%                         |
| <b>VPA-API</b>          | 360                | 11                        | 6.0%                         |
| <b>VPA-DAB</b>          | 257                | 23                        | 6.3%                         |
| <b>VPA-RIV</b>          | 174                | 20                        | 8.7%                         |
| <b>LEV-API</b>          | 170                | 10                        | 5.2%                         |
| <b>LEV-DAB</b>          | 122                | 25                        | 8.9%                         |
| <b>LEV-RIV</b>          | 87                 | 16                        | 8.3%                         |
| <b>NEU-API</b>          | 1620               | 16                        | 4.3%                         |
| <b>NEU-DAB</b>          | 1116               | 24                        | 4.4%                         |
| <b>NEU-RIV</b>          | 921                | 19                        | 5.2%                         |

**ABBREVIATIONS:** Antiseizure medications: LEV: levetiracetam; NEU: P-glycoprotein and cytochrome P450 neutral antiseizure medications; PHT: phenytoin; VPA: valproate  
Direct oral anticoagulants: API: apixaban; DAB: dabigatran; RIV: rivaroxaban

**N.B.:** Annual incidences were estimated by the Fine-Gray method, drug combinations with sample size less than 50 were not included

**Table S6. Patient characteristics after balancing with the inverse probability of treatment weighting method (sensitivity analysis)**

|                               | Neutral    | Phenytoin  | AMSD  | Valproate  | AMSD  | Levetiracetam | AMSD  |
|-------------------------------|------------|------------|-------|------------|-------|---------------|-------|
| n                             | 5400       | 948        |       | 870        |       | 578           |       |
| <b>Demographics</b>           |            |            |       |            |       |               |       |
| Age mean(sd)                  | 75.9(11.5) | 75.4(12.5) | 0.053 | 73.9(13.6) | 0.157 | 70.6(14.0)    | 0.068 |
| Female n(%)                   | 2366(43.8) | 463(48.8)  | 0.022 | 433(49.8)  | 0.050 | 323(55.9)     | 0.098 |
| Smoker n(%)                   | 95(1.8)    | 15(1.6)    | 0.005 | 10(1.1)    | 0.005 | 10(1.7)       | 0.011 |
| Drinker n(%)                  | 80(1.5)    | 17(1.8)    | 0.002 | 12(1.4)    | 0.000 | 16(2.8)       | 0.026 |
| <b>Medical Co-morbidities</b> |            |            |       |            |       |               |       |
| CHF n(%)                      | 1856(34.4) | 276(29.1)  | 0.039 | 250(28.7)  | 0.049 | 133(23.0)     | 0.031 |
| IHD n(%)                      | 1444(26.7) | 235(24.8)  | 0.011 | 204(23.4)  | 0.046 | 131(22.7)     | 0.063 |
| IS n(%)                       | 1750(32.4) | 600(63.3)  | 0.061 | 496(57.0)  | 0.128 | 316(54.7)     | 0.112 |
| ATE n(%)                      | 93(1.7)    | 5(0.5)     | 0.009 | 13(1.5)    | 0.000 | 6(1.0)        | 0.017 |
| VTE n(%)                      | 816(15.1)  | 188(19.8)  | 0.029 | 148(17.0)  | 0.040 | 143(24.7)     | 0.097 |
| DM n(%)                       | 1676(31.0) | 325(34.3)  | 0.065 | 279(32.1)  | 0.011 | 174(30.1)     | 0.033 |
| Hypertension n(%)             | 3291(60.9) | 608(64.1)  | 0.034 | 544(62.5)  | 0.029 | 323(55.9)     | 0.005 |
| PVD n(%)                      | 263(4.9)   | 52(5.5)    | 0.012 | 47(5.4)    | 0.009 | 27(4.7)       | 0.003 |
| Hyperlipidemia n(%)           | 1641(30.4) | 318(33.5)  | 0.001 | 281(32.3)  | 0.002 | 187(32.4)     | 0.016 |
| AF n(%)                       | 3708(68.7) | 671(70.8)  | 0.001 | 615(70.7)  | 0.033 | 361(62.5)     | 0.009 |
| Epilepsy n(%)                 | 288(5.3)   | 615(64.9)  | 0.073 | 446(51.3)  | 0.098 | 384(66.4)     | 0.227 |
| Major bleeding n(%)           | 320(5.9)   | 39(4.1)    | 0.001 | 42(4.8)    | 0.012 | 33(5.7)       | 0.014 |
| CLD n(%)                      | 37(0.7)    | 9(0.9)     | 0.002 | 2(0.2)     | 0.006 | 9(1.6)        | 0.002 |
| CKD n(%)                      | 312(5.8)   | 42(4.4)    | 0.009 | 40(4.6)    | 0.011 | 20(3.5)       | 0.005 |
| CHADS2Vasc mean(sd)           | 4.2(2.0)   | 4.7(2.0)   | NA    | 4.5(2.1)   | NA    | 4(2.2)        | NA    |
| HASBLED mean(sd)              | 2.7(1.3)   | 3.3(1.3)   | NA    | 3.2(1.4)   | NA    | 3.1(1.5)      | NA    |
| <b>Background Medications</b> |            |            |       |            |       |               |       |
| Apixaban n(%)                 | 2278(42.2) | 378(39.9)  | 0.023 | 368(42.3)  | 0.001 | 245(42.4)     | 0.097 |
| Dabigatran n(%)               | 1482(27.4) | 255(26.9)  | 0.004 | 226(26.0)  | 0.005 | 148(25.6)     | 0.083 |
| Edoxaban n(%)                 | 333(6.2)   | 36(3.8)    | 0.012 | 34(3.9)    | 0.012 | 33(5.7)       | 0.008 |
| Rivaroxaban n(%)              | 1307(24.2) | 279(29.4)  | 0.039 | 242(27.8)  | 0.018 | 152(26.3)     | 0.006 |
| Aspirin n(%)                  | 1515(28.1) | 306(32.3)  | 0.040 | 292(33.6)  | 0.045 | 184(31.8)     | 0.028 |
| Cilostazol n(%)               | 22(0.4)    | 1(0.1)     | 0.001 | 2(0.2)     | 0.004 | 0(0.0)        | 0.002 |

|                                       |             |             |       |             |       |             |       |
|---------------------------------------|-------------|-------------|-------|-------------|-------|-------------|-------|
| Clopidogrel n(%)                      | 400(7.4)    | 62(6.5)     | 0.004 | 46(5.3)     | 0.021 | 34(5.9)     | 0.031 |
| Ticagrelor n(%)                       | 30(0.6)     | 2(0.2)      | 0.003 | 1(0.1)      | 0.006 | 2(0.3)      | 0.000 |
| Simvastatin n(%)                      | 2063(38.2)  | 427(45.0)   | 0.057 | 371(42.6)   | 0.009 | 204(35.3)   | 0.050 |
| Atorvastatin n(%)                     | 0(0.0)      | 0(0.0)      | NA    | 0(0.0)      | NA    | 0(0.0)      | NA    |
| Rosuvastatin n(%)                     | 226(4.2)    | 27(2.8)     | 0.009 | 24(2.8)     | 0.000 | 21(3.6)     | 0.010 |
| Amiodarone n(%)                       | 146(2.7)    | 29(3.1)     | 0.003 | 27(3.1)     | 0.007 | 25(4.3)     | 0.004 |
| Dronedarone n(%)                      | 56(1.0)     | 2(0.2)      | 0.009 | 4(0.5)      | 0.007 | 1(0.2)      | 0.003 |
| Rifampicin n(%)                       | 6(0.1)      | 2(0.2)      | 0.000 | 1(0.1)      | 0.001 | 4(0.7)      | 0.002 |
| NSAID/COX2i n(%)                      | 359(6.6)    | 22(2.3)     | 0.030 | 30(3.4)     | 0.022 | 23(4.0)     | 0.014 |
| <b>Laboratory Parameters</b>          |             |             |       |             |       |             |       |
| APTT(s) median(iqr)                   | 34.3(7.8)   | 33.1(7.0)   | NA    | 33.7(7.7)   | NA    | 33.4(7.4)   | NA    |
| PT(s) median (iqr)                    | 24.4(5.1)   | 23.6(4.8)   | NA    | 24(4.9)     | NA    | 24(5.1)     | NA    |
| Hemoglobin(g/dL) mean(sd)             | 12(1.9)     | 12.1(1.8)   | 0.019 | 12.2(1.8)   | 0.037 | 12.1(1.9)   | 0.015 |
| Platelet(10 <sup>9</sup> /L) mean(sd) | 232.9(79.1) | 230.4(79.8) | 0.007 | 221.7(77.5) | 0.034 | 230.8(84.8) | 0.167 |
| Creatinine(umol/L) mean(sd)           | 95.7(53.0)  | 91.6(51.7)  | 0.014 | 91.9(53.8)  | 0.004 | 90.7(60.1)  | 0.221 |
| ALT(IU/L) mean(sd)                    | 32.8(43.6)  | 36.4(50.7)  | 0.012 | 29.7(32.1)  | 0.034 | 43.9(46.0)  | 0.083 |
| HbA1c(%) mean(sd)                     | 6.3(1.1)    | 6.3(1.1)    | 0.004 | 6.2(1.1)    | 0.028 | 6.2(1.0)    | 0.022 |
| HDL-C(mmol/L) mean(sd)                | 1.3(0.4)    | 1.3(0.4)    | 0.035 | 1.3(0.4)    | 0.046 | 1.2(0.4)    | 0.083 |
| LDL-C(mmol/L) mean(sd)                | 2.1(0.8)    | 2.2(0.8)    | 0.032 | 2.1(0.8)    | 0.151 | 2.1(0.8)    | 0.005 |
| TC(mmol/L) mean(sd)                   | 3.9(0.9)    | 4.1(0.9)    | 0.017 | 4(1.0)      | 0.124 | 4(1.0)      | 0.005 |
| Triglyceride(mmol/L) mean(sd)         | 1.3(0.7)    | 1.3(0.8)    | 0.043 | 1.3(0.7)    | 0.024 | 1.3(0.8)    | 0.103 |
| <b>Clinical Events</b>                |             |             |       |             |       |             |       |
| IS event n(%)                         | 288(5.3)    | 107(11.3)   | NA    | 91(10.5)    | NA    | 68(11.8)    | NA    |
| VTE event n(%)                        | 190(3.5)    | 63(6.6)     | NA    | 47(5.4)     | NA    | 64(11.1)    | NA    |
| Mortality n(%)                        | 1681(31.1)  | 435(45.9)   | NA    | 373(42.9)   | NA    | 215(37.2)   | NA    |

**Abbreviations:** AF: atrial fibrillation; ALT: alanine aminotransferase; AMSD: absolute mean standardized difference; APTT: activated partial thromboplastin time; ATE: non-ischemic stroke arterial thromboembolism; CHF: congestive heart failure; CKD: chronic kidney disease; CLD: chronic liver disease; COX2i: cyclo-oxygenase 2 inhibitor; DM: diabetes mellitus; HbA1c: glycated hemoglobin A1c; HDL-C: high density lipoprotein cholesterol; ICH: intracranial hemorrhage; IHD: ischemic heart disease; IS: ischemic stroke; LDL-C: low density lipoprotein cholesterol; NA: not applicable; NSAID: non-steroidal anti-inflammatory drugs; PT: prothrombin time; PVD: peripheral vascular disease; TC: total cholesterol; VTE: venous thromboembolism

**Table S7. Patient characteristics after balancing with the inverse probability of treatment weighting method (epilepsy subgroup – sensitivity analysis)**

|                               | Neutral    | Phenytoin  | AMSD  | Valproate  | AMSD  | Levetiracetam | AMSD  |
|-------------------------------|------------|------------|-------|------------|-------|---------------|-------|
| n                             | 288        | 615        |       | 446        |       | 384           |       |
| <b>Demographics</b>           |            |            |       |            |       |               |       |
| Age mean(sd)                  | 72.3(12.8) | 75.5(12.4) | 0.084 | 73.9(13.7) | 0.110 | 71.5(13.8)    | 0.045 |
| Female n(%)                   | 142(49.3)  | 316(51.4)  | 0.029 | 226(50.7)  | 0.005 | 224(58.3)     | 0.077 |
| Smoker n(%)                   | 1(0.3)     | 8(1.3)     | 0.010 | 3(0.7)     | 0.002 | 6(1.6)        | 0.013 |
| Drinker n(%)                  | 0(0.0)     | 10(1.6)    | 0.013 | 6(1.3)     | 0.008 | 11(2.9)       | 0.019 |
| <b>Medical Co-morbidities</b> |            |            |       |            |       |               |       |
| CHF n(%)                      | 76(26.4)   | 183(29.8)  | 0.007 | 133(29.8)  | 0.040 | 91(23.7)      | 0.034 |
| IHD n(%)                      | 65(22.6)   | 147(23.9)  | 0.003 | 108(24.2)  | 0.003 | 102(26.6)     | 0.035 |
| IS n(%)                       | 196(68.1)  | 456(74.1)  | 0.034 | 316(70.9)  | 0.028 | 245(63.8)     | 0.042 |
| ATE n(%)                      | 5(1.7)     | 3(0.5)     | 0.009 | 5(1.1)     | 0.003 | 6(1.6)        | 0.002 |
| VTE n(%)                      | 59(20.5)   | 123(20.0)  | 0.017 | 67(15.0)   | 0.035 | 85(22.1)      | 0.018 |
| DM n(%)                       | 90(31.3)   | 199(32.4)  | 0.009 | 147(33.0)  | 0.003 | 130(33.9)     | 0.033 |
| Hypertension n(%)             | 178(61.8)  | 406(66.0)  | 0.009 | 295(66.1)  | 0.021 | 233(60.7)     | 0.003 |
| AF n(%)                       | 194(67.4)  | 455(74.0)  | 0.029 | 337(75.6)  | 0.050 | 267(69.5)     | 0.022 |
| Epilepsy n(%)                 | 288(100.0) | 615(100.0) | NA    | 446(100.0) | NA    | 384(100.0)    | NA    |
| Major bleeding n(%)           | 13(4.5)    | 22(3.6)    | 0.001 | 21(4.7)    | 0.006 | 22(5.7)       | 0.010 |
| CLD n(%)                      | 1(0.3)     | 7(1.1)     | 0.007 | 1(0.2)     | 0.003 | 3(0.8)        | 0.003 |
| CKD n(%)                      | 11(3.8)    | 26(4.2)    | 0.004 | 17(3.8)    | 0.008 | 14(3.6)       | 0.002 |
| <b>Background Medications</b> |            |            |       |            |       |               |       |
| Apixaban n(%)                 | 111(38.5)  | 243(39.5)  | 0.007 | 175(39.2)  | 0.009 | 153(39.8)     | 0.011 |
| Dabigatran n(%)               | 84(29.2)   | 166(27.0)  | 0.016 | 117(26.2)  | 0.013 | 108(28.1)     | 0.007 |
| Edoxaban n(%)                 | 9(3.1)     | 21(3.4)    | 0.010 | 15(3.4)    | 0.003 | 16(4.2)       | 0.011 |
| Rivaroxaban n(%)              | 84(29.2)   | 185(30.1)  | 0.001 | 139(31.2)  | 0.007 | 107(27.9)     | 0.015 |
| Aspirin n(%)                  | 94(32.6)   | 193(31.4)  | 0.012 | 157(35.2)  | 0.042 | 134(34.9)     | 0.019 |
| Cilostazol n(%)               | 1(0.3)     | 0(0.0)     | 0.003 | 2(0.4)     | 0.002 | 0(0.0)        | 0.004 |
| Clopidogrel n(%)              | 22(7.6)    | 31(5.0)    | 0.016 | 25(5.6)    | 0.027 | 27(7.0)       | 0.009 |
| Ticagrelor n(%)               | 1(0.3)     | 1(0.2)     | 0.002 | 0(0.0)     | NA    | 1(0.3)        | 0.001 |
| Simvastatin n(%)              | 126(43.8)  | 274(44.6)  | 0.005 | 209(46.9)  | 0.003 | 149(38.8)     | 0.040 |
| Atorvastatin n(%)             | 0(0.0)     | 0(0.0)     | NA    | 0(0.0)     | NA    | 0(0.0)        | NA    |
| Rosuvastatin n(%)             | 10(3.5)    | 16(2.6)    | 0.004 | 9(2.0)     | 0.016 | 15(3.9)       | 0.002 |
| Amiodarone n(%)               | 9(3.1)     | 18(2.9)    | 0.004 | 13(2.9)    | 0.010 | 12(3.1)       | 0.001 |

|                                       |             |             |       |             |       |             |       |
|---------------------------------------|-------------|-------------|-------|-------------|-------|-------------|-------|
| Dronedaron n(%)                       | 0(0.0)      | 2(0.3)      | 0.003 | 2(0.4)      | 0.001 | 0(0.0)      | NA    |
| Rifampicin n(%)                       | 0(0.0)      | 2(0.3)      | 0.003 | 0(0.0)      | NA    | 2(0.5)      | 0.005 |
| NSAID/COX2i n(%)                      | 9(3.1)      | 12(2.0)     | 0.007 | 10(2.2)     | 0.010 | 14(3.6)     | 0.005 |
| <b>Laboratory Parameters</b>          |             |             |       |             |       |             |       |
| APTT(s) median(iqr)                   | 34.4(8.7)   | 33.7(7.4)   | NA    | 33.5(7.9)   | NA    | 33.7(7.2)   | NA    |
| PT(s) median(iqr)                     | 24.2(5.6)   | 24.1(5.2)   | NA    | 23.9(5.0)   | NA    | 24.2(4.9)   | NA    |
| Hemoglobin(g/dL) mean(sd)             | 12.3(1.9)   | 12.3(1.8)   | 0.008 | 12.4(1.8)   | 0.031 | 12.4(1.9)   | 0.026 |
| Platelet(10 <sup>9</sup> /L) mean(sd) | 235.5(85.5) | 226.4(77.4) | 0.032 | 217.6(75.4) | 0.156 | 227.9(85.3) | 0.078 |
| Creatinine(umol/L) mean(sd)           | 90.6(46.7)  | 91.3(46.6)  | 0.024 | 89.1(31.6)  | 0.054 | 90.8(46.7)  | 0.002 |
| ALT(IU/L) mean(sd)                    | 31.4(22.5)  | 33.4(39.3)  | 0.086 | 28.9(27.1)  | 0.134 | 41.7(40.6)  | 0.196 |
| HbA1c(%) mean(sd)                     | 6.2(1.0)    | 6.2(1.1)    | 0.009 | 6.1(1.1)    | 0.113 | 6.1(1.0)    | 0.090 |
| HDL-C(mmol/L) mean(sd)                | 1.3(0.4)    | 1.3(0.4)    | 0.028 | 1.3(0.4)    | 0.015 | 1.3(0.4)    | 0.052 |
| LDL-C(mmol/L) mean(sd)                | 2.2(0.8)    | 2.2(0.8)    | 0.015 | 2.1(0.8)    | 0.063 | 2.1(0.8)    | 0.108 |
| TC(mmol/L) mean(sd)                   | 4.1(1.0)    | 4.1(0.9)    | 0.029 | 4(0.9)      | 0.111 | 3.9(0.9)    | 0.169 |
| Triglyceride(mmol/L) mean(sd)         | 1.4(0.7)    | 1.3(0.8)    | 0.014 | 1.3(0.7)    | 0.180 | 1.3(0.7)    | 0.090 |
| CHADS2Vasc mean(sd)                   | 4.6(2.1)    | 4.9(2.0)    | NA    | 4.8(2.1)    | NA    | 4.4(2.2)    | NA    |
| HASBLED mean(sd)                      | 3.4(1.3)    | 3.6(1.3)    | NA    | 3.5(1.3)    | NA    | 3.4(1.4)    | NA    |
| <b>Clinical Events</b>                |             |             |       |             |       |             |       |
| IS event n(%)                         | 41(14.2)    | 73(11.9)    | NA    | 65(14.6)    | NA    | 57(14.8)    | NA    |
| VTE event n(%)                        | 25(8.7)     | 39(6.3)     | NA    | 26(5.8)     | NA    | 37(9.6)     | NA    |
| Mortality n(%)                        | 94(32.6)    | 281(45.7)   | NA    | 204(45.7)   | NA    | 135(35.2)   | NA    |

**Abbreviations:** AF: atrial fibrillation; ALT: alanine aminotransferase; AMSD: absolute mean standardized difference; APTT: activated partial thromboplastin time; ATE: non-ischemic stroke arterial thromboembolism; CHF: congestive heart failure; CKD: chronic kidney disease; CLD: chronic liver disease; COX2i: cyclo-oxygenase 2 inhibitor; DM: diabetes mellitus; HbA1c: glycated hemoglobin A1c; HDL-C: high density lipoprotein cholesterol; ICH: intracranial hemorrhage; IHD: ischemic heart disease; IS: ischemic stroke; LDL-C: low density lipoprotein cholesterol; NA: not applicable; NSAID: non-steroidal anti-inflammatory drugs; PT: prothrombin time; PVD: peripheral vascular disease; TC: total cholesterol; VTE: venous thromboembolism

**Table S8. Outcome comparison among ASMs (sensitivity analysis)**

|                               | Primary Analysis<br>(n=7796)    |                    |         | Epilepsy Subgroup<br>(n=1733)   |                    |         |
|-------------------------------|---------------------------------|--------------------|---------|---------------------------------|--------------------|---------|
|                               | Median<br>follow-up<br>(months) | aHR (95% CI)       | p-value | Median<br>follow-up<br>(months) | aHR (95% CI)       | p-value |
| <b>Ischemic stroke</b>        |                                 |                    |         |                                 |                    |         |
| Phenytoin vs Neutral ASM      | 15                              | 1.51 (1.08 - 2.13) | 0.017   | 15                              | 0.80 (0.55 - 1.18) | 0.257   |
| Valproate vs Neutral ASM      | 14                              | 1.17 (0.81 - 1.69) | 0.391   | 14                              | 0.97 (0.60 - 1.55) | 0.892   |
| Levetiracetam vs Neutral ASM  | 13                              | 1.5 (0.70 - 3.22)  | 0.300   | 13                              | 0.92 (0.62 - 1.37) | 0.685   |
| <b>Venous thromboembolism</b> |                                 |                    |         |                                 |                    |         |
| Phenytoin vs Neutral ASM      | 16                              | 1.61 (1.06 - 2.43) | 0.025   | 16                              | 0.78 (0.47 - 1.32) | 0.358   |
| Valproate vs Neutral ASM      | 15                              | 1.72 (1.09 - 2.70) | 0.020   | 15                              | 0.73 (0.37 - 1.43) | 0.358   |
| Levetiracetam vs Neutral ASM  | 14                              | 2.69 (0.93 - 7.76) | 0.060   | 14                              | 0.93 (0.56 - 1.54) | 0.777   |
| <b>Death</b>                  |                                 |                    |         |                                 |                    |         |
| Phenytoin vs Neutral ASM      | 18                              | 1.50 (1.27 - 1.76) | <0.001  | 18                              | 1.34 (1.06 - 1.70) | 0.014   |
| Valproate vs Neutral ASM      | 17                              | 1.30 (1.10 - 1.54) | 0.002   | 17                              | 1.42 (1.07 - 1.89) | 0.014   |
| Levetiracetam vs Neutral ASM  | 16                              | 0.96 (0.59 - 1.57) | 0.87    | 16                              | 0.90 (0.69 - 1.17) | 0.432   |

**Abbreviations:** ASM: antiseizure medications; aHR: adjusted hazard ratio; CI: confidence interval
